# Supplementary material
Source: Springer Nature journal article supplement (https://www.springermedizin.de/resource/supplementary/12995_2009_120_MOESM3_ESM.pdf/9622722)

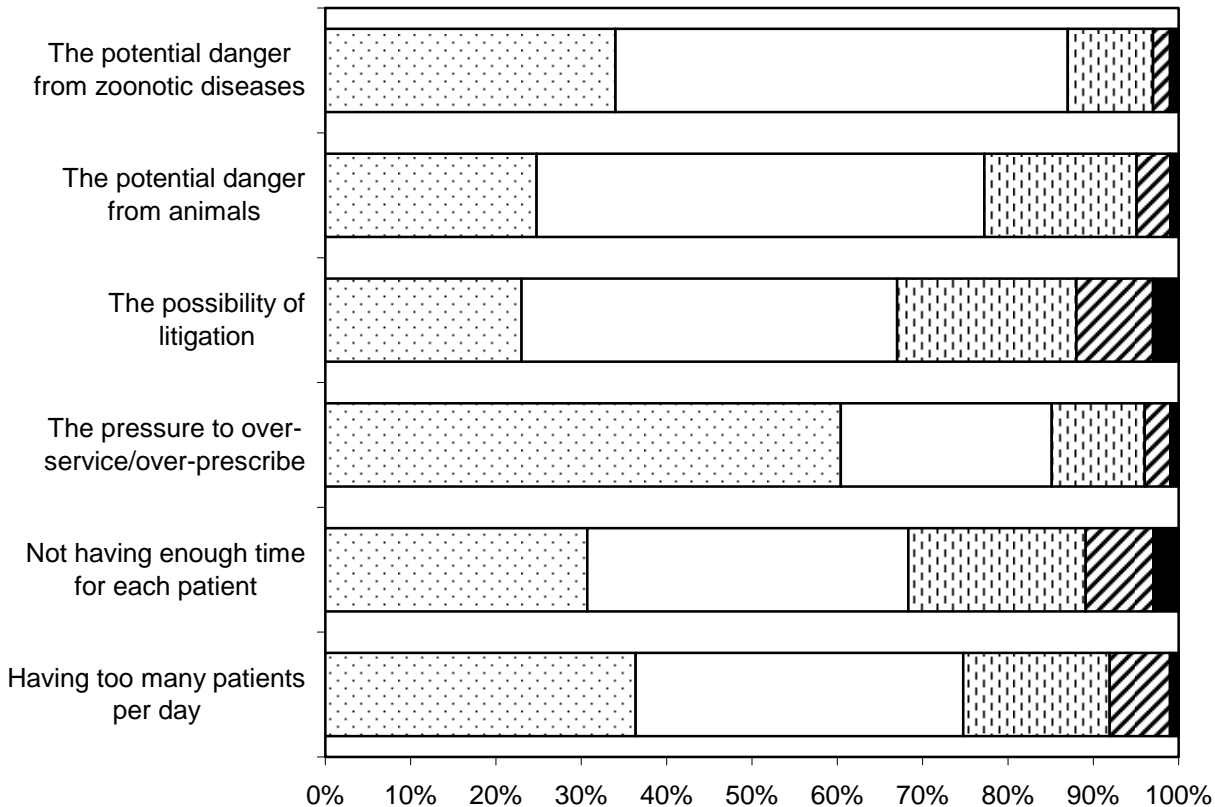

No stress   
  Mild stress   
  Moderate stress   
  Much stress   
  Extreme stress

Supplement: MOESM3 [file 9622722]
